# Supplementary material
Source: HighWire-hosted journal article supplement (http://jpet.aspetjournals.org/highwire/filestream/146145/field_highwire_adjunct_files/0/261040SupplData.pdf)

## **Supplementary Data and Methods**

### **A novel small molecule inhibits tumor growth and synergizes effects of enzalutamide on prostate cancer**

Jiongjia Cheng, Stephanie Moore, Jorge Gomez-Galeno, Dong-Hoon Lee, Karl J. Okolotowicz and John R. Cashman

*Human BioMolecular Research Institute and ChemRegen, Inc., San Diego, CA, 92121, USA*

### **Supplementary Materials and Methods**

#### **Chemicals and Reagents**

The following materials (purchased from) were used: Dulbecco's phosphate buffered solution (DPBS), trypsin-EDTA, RPMI (Corning Inc., Corning, NY); Fetal bovine serum (Atlanta Biologicals, Flowery Branch, GA); SYBR Green I nucleic acid stain in DMSO (Lonza, Allendale, NJ); protease inhibitors (Roche, Indianapolis, IN); Pierce BCA protein assay kit and ECL reagent (Thermo Scientific, Rockford, IL); NuPAGE® Bis-Tris Gel (Life Technologies, Carlsbad, CA); Enzalutamide, Abiraterone (eNovation Chemicals, Bridgewater Township, NJ); Triton-X-100, bovine serum albumin fraction V (BSA), EDTA, sodium chloride, nonylphenoxypolyethoxyethanol (NP-40), 3 $\alpha$ ,12 $\alpha$ -dihydroxy-5 $\beta$ -cholanolic acid sodium salt (sodium deoxycholate), polyethylene glycol sorbitan monolaurate (Tween-20), dodecyl sulfate sodium salt (SDS) (Sigma-Aldrich, St. Louis, MO); and other chemicals, reagents, solvents and devices (VWR, San Diego, CA). RIPA buffer: 25 mM Tris-HCl, pH 7.6, 150 mM NaCl, 1 % NP-40, 1 % sodium doxycholate, 0.1 % SDS in the presence of 1 $\times$  protease inhibitors.

#### **Antibodies**

The following antibodies were used: anti-p53 (Cell Signaling #9282; Bio-Rad, #MCA1701), anti-phospho-Ser15-p53 (Cell Signaling #9284), anti-phospho-Ser428-ATR (Cell Signaling #2853), anti-phospho-Ser1981-ATM (Cell Signaling #5883), anti-Bcl-2 (Santa Cruz #sc-509), anti-Bcl-xL (Cell Signaling #2764; Santa Cruz #sc-8392), anti-Mcl-1 (Santa Cruz #sc-74436), anti-Bax (Cell Signaling #5883), anti-Bak (Santa Cruz #sc-517390), anti-Cytochrome c (Santa Cruz #sc-13156), anti-PARP (Cell Signaling #9532), anti-Tom20 (Santa Cruz #sc-17764), anti-VDAC1 (Santa Cruz #sc-390996), anti-HSP60 (Santa Cruz #sc-13115), anti-acetylated-tubulin (Sigma #T7451), anti-GAPDH (Santa Cruz #sc-47724) and anti-HSP90a/ $\beta$  Antibody (Santa Cruz #sc-13119).

**Table S1.** Clinical chemistry serum values observed for vehicle-, enzalutamide (Enza)-, PAWI-2 and both enzalutamide and PAWI-2-treated mice

| Condition        | Parameter <sup>a</sup>    |                                     |                                     |                   |                             |                       |                        |                    |
|------------------|---------------------------|-------------------------------------|-------------------------------------|-------------------|-----------------------------|-----------------------|------------------------|--------------------|
|                  | ALP <sup>b</sup><br>(U/L) | SGPT<br>(ALT) <sup>b</sup><br>(U/L) | SGOT<br>(AST) <sup>b</sup><br>(U/L) | Albumin<br>(g/dL) | BUN <sup>b</sup><br>(mg/dL) | Creatinine<br>(mg/dL) | Cholesterol<br>(mg/dL) | Glucose<br>(mg/dL) |
| Vehicle          | 59                        | 65                                  | 127                                 | 2.8               | 22                          | 0.2                   | 126                    | 175                |
| Enza             | 48                        | 130                                 | 413                                 | 2.3               | 24                          | 0.1                   | 102                    | 157                |
| PAWI-2           | 46                        | 168                                 | 253                                 | 2.2               | 24                          | 0.2                   | 120                    | 84                 |
| Enza +<br>PAWI-2 | 38                        | 75                                  | 128                                 | 2.0               | 32                          | 0.1                   | 125                    | 82                 |

<sup>a</sup>Independent analysis of serum samples from four different animal groups (vehicle-, enzalutamide (Enza)-, PAWI-2 and both enzalutamide and PAWI-2-treated mice);

<sup>b</sup>ALP: Alkaline Phosphatase; SGPT (ALT): Serum Glutamic Pyruvic Transaminase (Alanine Aminotransferase); SGOT (AST): Serum Glutamic Oxaloacetic Transaminase (Aspartate Aminotransferase); BUN: Blood Urea Nitrogen.

**Table S2.** Comparison of pharmaceutical properties of PAWI-2 to other PCa drugs.

| Drug name    | Structure <sup>a</sup>                                                              | Lipinski value <sup>a</sup> | ADME data <sup>a,b</sup>                                                                                                                               | Safety/ Toxicity <sup>a,c</sup>            |
|--------------|-------------------------------------------------------------------------------------|-----------------------------|--------------------------------------------------------------------------------------------------------------------------------------------------------|--------------------------------------------|
| PAWI-2       | 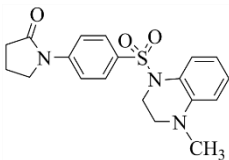   | 0                           | Bioavailability = 12% (HCl salt; rat); V <sub>ss</sub> , N/A; t <sub>1/2</sub> = 16.5 h; CL = 43 L/min/kg (rat); ~5% metabolized                       | No toxicity observed at 1 g/kg (i.p.; rat) |
| Docetaxel    |    | 2                           | Bioavailability = ~8%; V <sub>ss</sub> = 113 L; t <sub>1/2</sub> = 11.1 h; CL = 21 L/h; hepatically metabolized to 1 major and 3 minor metabolites     | LD <sub>50</sub> >2 g/kg (oral; rat)       |
| Cabazitaxel  |    | 3                           | Bioavailability = 7.7%; V <sub>ss</sub> = 4864 L; t <sub>1/2</sub> = 13.5 h; CL = 48.5 L/h; extensively metabolized                                    | LD <sub>50</sub> = 500 mg/kg (oral; rat)   |
| Abiraterone  |   | 1                           | Bioavailability = ~10% (acetate salt); V <sub>ss</sub> = 19669 L; t <sub>1/2</sub> = 10.3 h; CL = 307 L/h; metabolized to 2 inactive major metabolites | LD <sub>50</sub> = 980 mg/kg (oral; rat)   |
| Enzalutamide |  | 0                           | Bioavailability = 89.7% (rat); V <sub>d</sub> /F = 110 L; t <sub>1/2</sub> = 5.8 days; CL = 0.56 L/h; hepatically metabolized into active metabolite   | LD <sub>50</sub> = 400 mg/kg (oral; mouse) |
| Bicalutamide |  | 0                           | Bioavailability unknown, highly absorbed; V <sub>ss</sub> , N/A; t <sub>1/2</sub> = 5.9 days; CL = 0.32 L/h; stereoselective metabolism                | LD <sub>50</sub> >2 g/kg (oral; rat)       |

<sup>a</sup>Structure, Lipinski values and ADME, Safety/Toxicity data of listed clinical PCa drugs were obtained from Drugbank website (<https://www.drugbank.ca/>). The data of PAWI-2 was cited from previously published paper [Cheng et al., *Cancer Res.*, 2018, 78, 5072].

<sup>b</sup>V<sub>ss</sub>, volume of distribution at steady state; t<sub>1/2</sub>, the mean terminal elimination half-life; CL, clearance; V<sub>d</sub>/F, apparent volume of distribution; N/A, not available;

<sup>c</sup>LD<sub>50</sub>: lethal dose for 50 percent of the animals tested.

**Figure S1.** Effect of PAWI-2 on **A**) inhibition of cell viability (72 hours), **B**) activation of cell apoptosis (24 hours) in 11220-hTERT normal prostate epithelia cells; data for prostate cancer cells (PC-3 and LNCaP) also shown. The dose of PAWI-2 was 0.32 nM to 5  $\mu$ M. Data are mean  $\pm$  SD (n = 3); *P*-values were estimated by one-way ANOVA test (\**P*<0.05, \*\**P*<0.01).

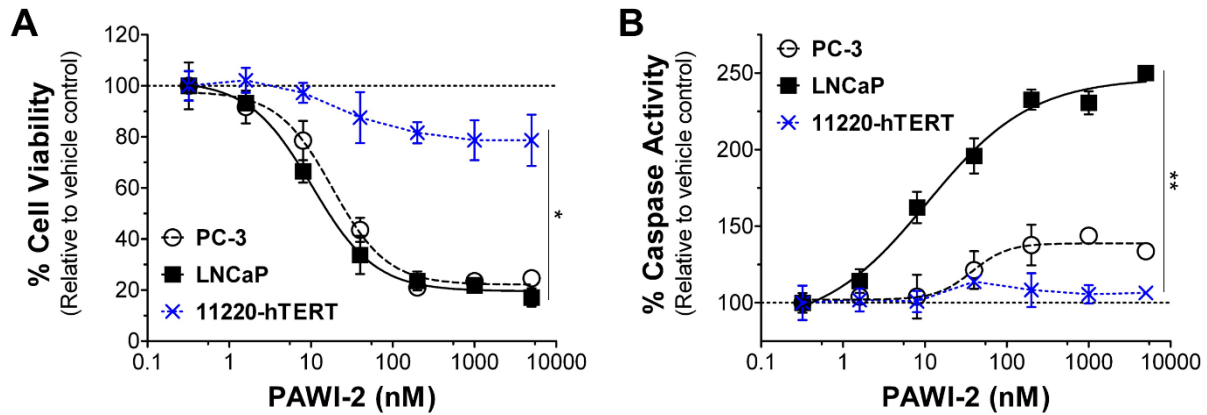

**Figure S2.** Effect of PAWI-2 on cell viability of PCa cells in the presence of enzalutamide in PC-3 and LNCaP cells. Concentration of enzalutamide was 500 nM. The concentration of PAWI-2 was 20 and 100 nM, as indicated. Treatment time was 24 hours. Data represents the mean  $\pm$  SD (n = 3) as determined for compound-treated samples relative to vehicle control. Veh, vehicle control (0.5% DMSO); Enza, enzalutamide. There was no significant difference as determined by one-way ANOVA test (*P*>0.05).

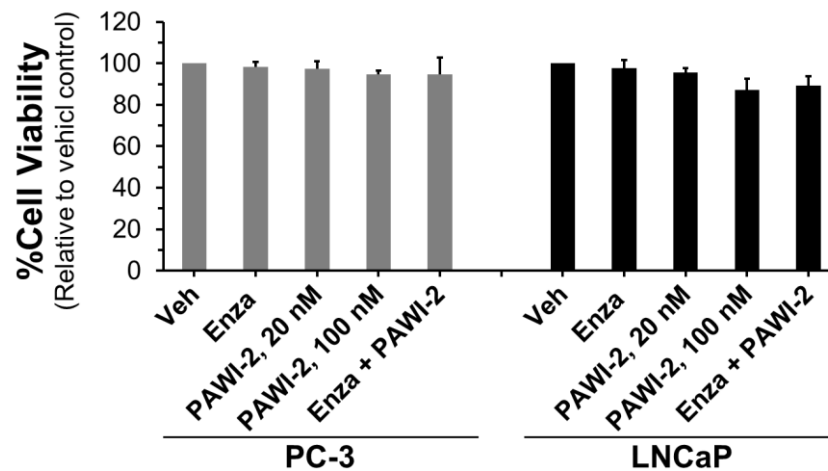

**Figure S3.** Effect on prostate cancer cell viability for PAWI-2 (concentration  $<IC_{50}$ ) in combination with enzalutamide or abiraterone in **A**) PC-3 and **B**) LNCaP PCa cells. The concentration of PAWI-2 was 8 and 2 nM in PC-3 and LNCaP cells, respectively; Enza, enzalutamide; Abi, abiraterone; vehicle control (0.5% DMSO). Data are mean  $\pm$  SD ( $n = 3$ );  $P$ -values were estimated by one-way ANOVA test (\*\* $P < 0.001$ ).

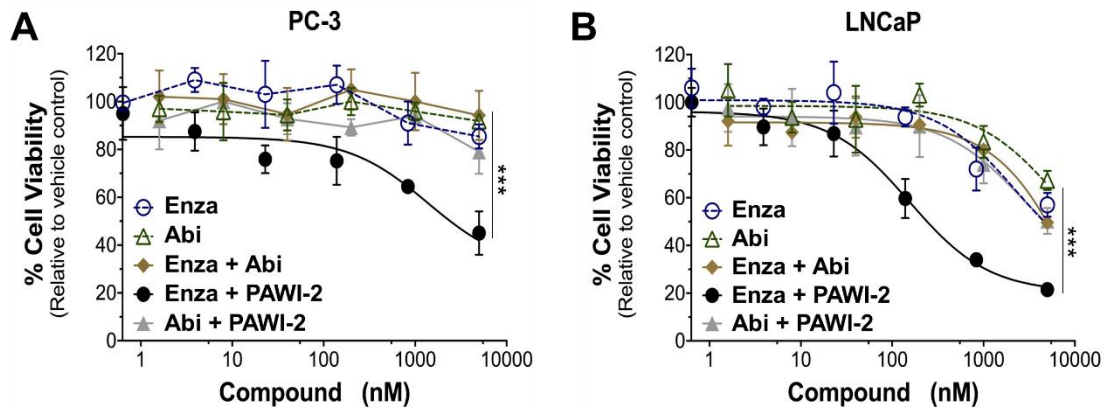

**Figure S4.** Time-dependent activation of Caspase-3/7 by PAWI-2 in the presence of enzalutamide (Enza) and/or abiraterone (Abi) in **A**) PC-3 and **B**) LNCaP cells. Concentrations used: PC-3 (Enza, 500 nM; Abi, 3  $\mu$ M; PAWI-2, 100 nM); LNCaP (Enza, 500 nM; Abi, 3  $\mu$ M; PAWI-2, 20 nM). Treatment time was 0-72 hours. Veh, vehicle control (0.5% DMSO); Enza, enzalutamide; and Abi, abiraterone. Data represents the mean  $\pm$  SD ( $n = 3$ ) as determined for compound-treated samples relative to vehicle control.  $P$ -values were estimated by one-way ANOVA test (\*\* $P < 0.01$ , \*\*\* $P < 0.001$ ).

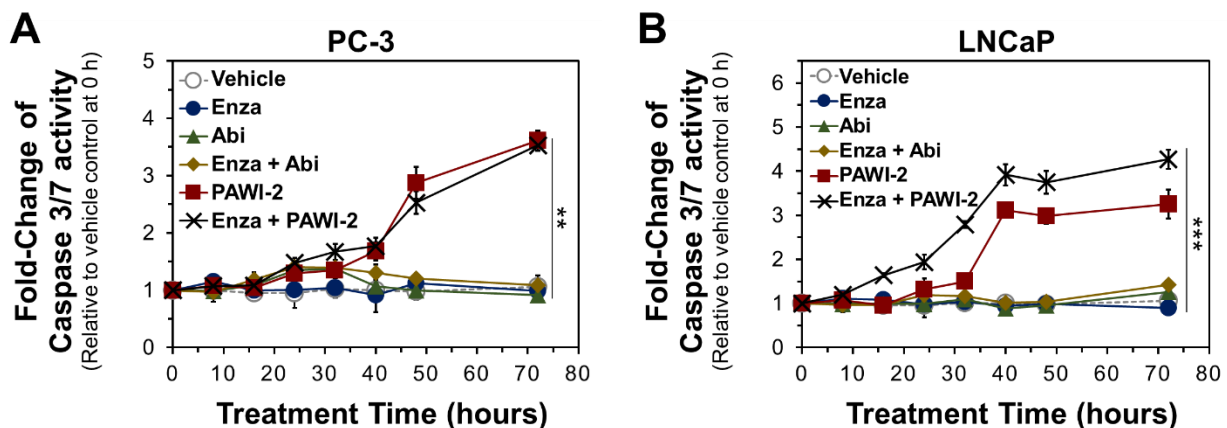

**Figure S5.** Effect of PAWI-2 on DNA damage pathway marker (phosphorylated-ATR), apoptotic pathway markers (p53, phosphorylated p53 (p53), PARP cleavage). **A)** Western blots and **B)** densitometry analysis were determined from whole-cell extracts of PC-3 and LNCaP cells in the presence of enzalutamide and/or abiraterone. The concentrations used: PC-3 (Enza, 500 nM; Abi, 3  $\mu$ M; PAWI-2, 100 nM); LNCaP (Enza, 500 nM; Abi, 3  $\mu$ M; PAWI-2, 50 nM). Treatment time was 48 hours for PARP and 24 hours for other markers; Veh, vehicle control (0.5% DMSO); Enza, enzalutamide; and Abi, abiraterone. GAPDH was used as an internal control. Data are mean  $\pm$  SD (n = 3) in **B**.

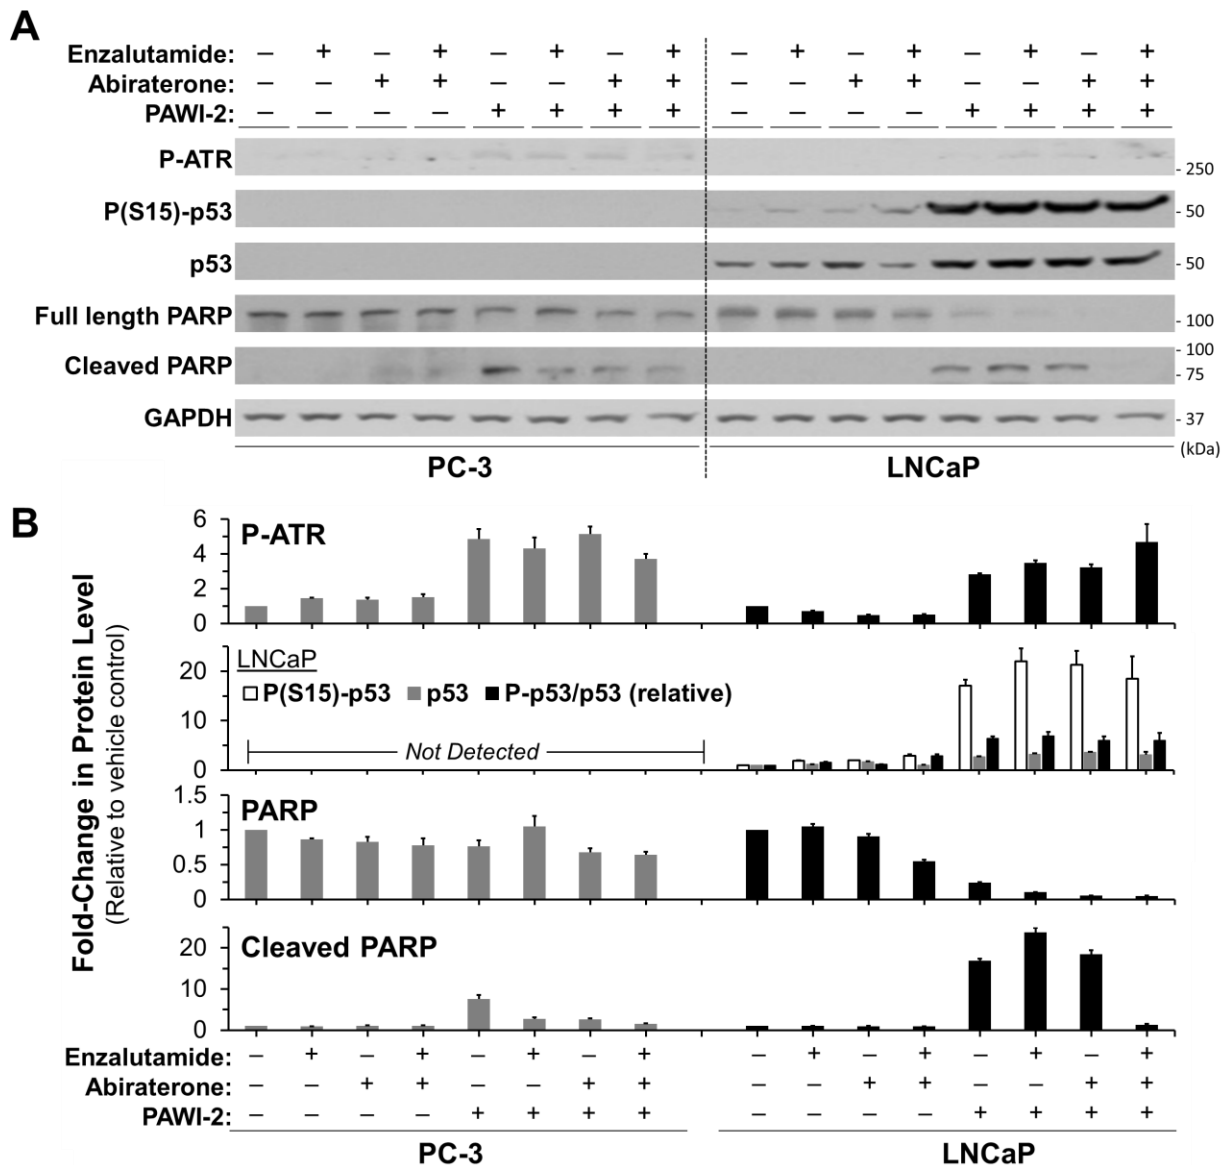

**Figure S6.** Time-dependent effect on mitochondrial membrane potential by PAWI-2 in the presence of enzalutamide and/or abiraterone determined by TMRE assay in **A**) PC-3 and **B**) LNCaP cells. Concentrations used: PC-3 (Enza, 500 nM; Abi, 3  $\mu$ M; PAWI-2, 100 nM); LNCaP (Enza, 500 nM; Abi, 3  $\mu$ M; PAWI-2, 50 nM). Treatment time was 0-48 hours. Veh, vehicle control (0.5% DMSO); Enza, enzalutamide; and Abi, abiraterone. Data are mean  $\pm$  SD (n = 3). *P*-values were estimated by one-way ANOVA test (\**P*<0.05, \*\**P*<0.01).

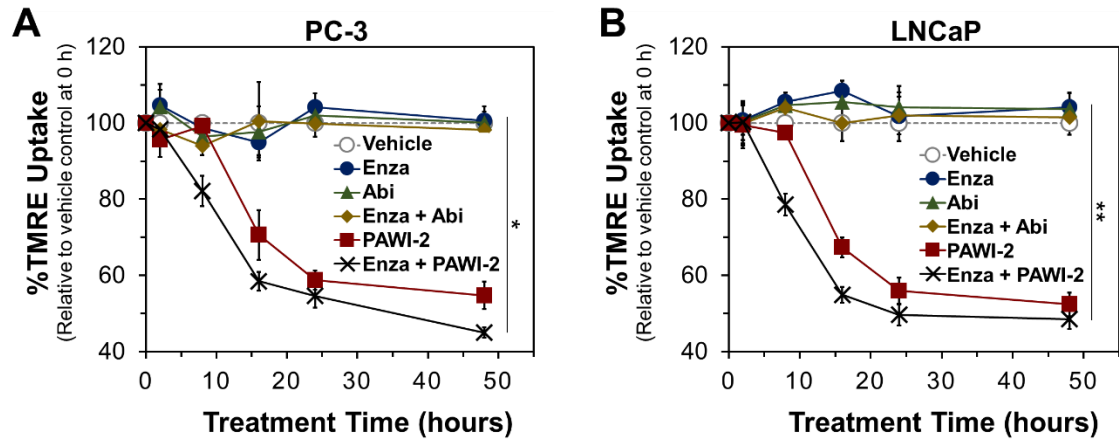

**Figure S7.** Western blot analysis of the effect of PAWI-2 on the inhibition of acetylated tubulin (Ac-Tub) as determined by **A**) dose-dependence of PAWI-2 and **B**) in the presence of enzalutamide in whole cell extracts of PC-3 and LNCaP cells. Concentrations of PAWI-2 were 20, 50, 100 and 200 nM in **A** and 100 nM for PC-3 and 50 nM for LNCaP in **B**; Concentrations of enzalutamide and abiraterone treatment were 500 nM and 3  $\mu$ M, respectively. Treatment time used was 24 hours. Veh, vehicle control (0.5% DMSO); Ac-Tub, acetylated tubulin. GAPDH was used as an internal control.

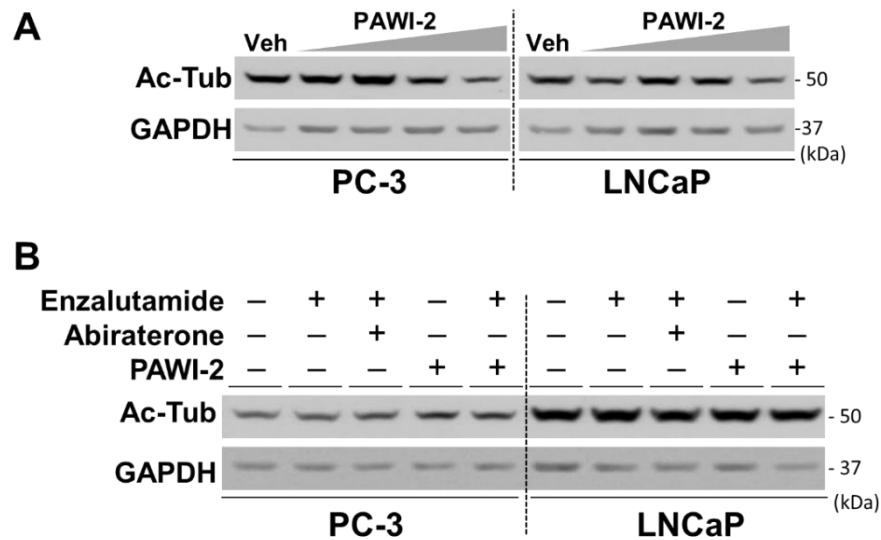

Supplement: 261040SupplData.pdf [file 261040SupplData.pdf]
